# Supplementary material for: Waves of Retrotransposon Expansion Remodel Genome Organization and CTCF Binding in Multiple Mammalian Lineages
Source: PubMed Central journal article supplement (PMC3368268; doi:10.1016/j.cell.2011.11.058), 2012-01-20
Supplement: mmc1.pdf [file mmc1.pdf]

**Table S1: Read mapping overview and replicate correlations, related to Figure 1**

(A) Summary of total number of DNA sequence reads mapped using Bowtie to the following genome assemblies: mouse NCBI m37 (mm9); dog CanFam 2.0 (canFam2); human GRCh37 (hg19); opossum MonDom5 (monDom5); rat RGSC 3.4 (rn4); and rhesus macaque Mmul\_1 (rheMac2).

(B) Spearman's rho was calculated between each CTCF ChIP-seq replicate to confirm reproducibility of CTCF ChIP-seq as described in the Extended Experimental Procedures.

Table S1A

| CTCF  | Aligned ChIP reads | Aligned Input reads |
|-------|--------------------|---------------------|
| Hsap  | 26008297           | 24461768            |
| Mmul  | 20101768           | 18913816            |
| Mmus  | 25855946           | 17572031            |
| Rnor  | 40716782           | 38323754            |
| Cfam  | 22983440           | 24197289            |
| Mdom  | 38176713           | 31915578            |
| Total | 173842946          | 155384236           |

Table S1B

| Species | Sample 1 | Sample 2 | Spearman Correlation |
|---------|----------|----------|----------------------|
| Human   | do506    | do778    | 0.87                 |
| Rhesus  | do45     | do186    | 0.91                 |
| Rhesus  | do45     | do188    | 0.90                 |
| Rhesus  | do186    | do188    | 0.90                 |
| Mouse   | do464    | do781    | 0.95                 |
| Rat     | do804    | do807    | 0.98                 |
| Dog     | do301    | do780    | 0.79                 |
| Opossum | do782    | do719    | 0.91                 |
